# Supplementary material for: Respiratory Support Adjustments and Monitoring of Mechanically Ventilated Patients Performing Early Mobilization: A Scoping Review
Source: PubMed Central journal article supplement — Crit Care Explor. 2021 Apr 26;3(4):e0407. doi: 10.1097/CCE.0000000000000407 (PMC8078339; doi:10.1097/cce.0000000000000407), 2021-04-26
Supplement: cc9-3-e0407-s001.pdf [file cc9-3-e0407-s001.pdf]

**Table S1.** Operational definitions

| <b>Concept</b>                          | <b>Definition/criteria</b>                                                                                                                                                                                                                                                                                                                                                                                                                                                                                                                                                                                                                                                                                                                                                       |
|-----------------------------------------|----------------------------------------------------------------------------------------------------------------------------------------------------------------------------------------------------------------------------------------------------------------------------------------------------------------------------------------------------------------------------------------------------------------------------------------------------------------------------------------------------------------------------------------------------------------------------------------------------------------------------------------------------------------------------------------------------------------------------------------------------------------------------------|
| Early mobilization intervention         | Any intervention aiming to recover functional status and has been proposed as a promising intervention to counteract the intensive care unit acquired weakness, performed between days 2 and 5 from ICU admission or when safety criteria allowed starting mobilization (1, 2). This can be done by any health professional (e.g. physical therapists, nurses, occupational therapists). Early mobilization can be considered as synonyms of physical rehabilitation, mobilization, exercise, physical therapy and rehabilitation (3). Early mobilization may include interventions such as cycling, progressive mobility, walking, in-bed passive exercise, in-bed active exercise, neuromuscular electrical stimulation, tilt-table, FES-cycling and whole-body vibration (3). |
| Respiratory support                     | Any treatment that assists totally or partially the respiratory function, including mechanical ventilation, non-invasive ventilation, extra corporeal carbon dioxide removers, extra corporeal membrane oxygenation. Respiratory support depends of the ventilatory modes setting and the respiratory parameters adjustment.                                                                                                                                                                                                                                                                                                                                                                                                                                                     |
| Ventilatory mode                        | Refers to the method that the ventilator delivers the positive pressure to the patient, included, assist-control modes (e.g. Pressure-controlled ventilation), assisted modes (e.g. Pressure support ventilation) and proportional modes (e.g. Proportional assist ventilation).                                                                                                                                                                                                                                                                                                                                                                                                                                                                                                 |
| Respiratory parameter                   | Any respiratory variable programmed by clinical staff to adjust the respiratory support according the respiratory patient's needs. For example, mandatory respiratory rate, fraction of inspired oxygen, positive end expiratory pressure, targeted pressure or volume prescription.                                                                                                                                                                                                                                                                                                                                                                                                                                                                                             |
| Respiratory support adjustment on early | Any modification on respiratory support setting before, during or after mobilization. For example, increasing support level during pressure                                                                                                                                                                                                                                                                                                                                                                                                                                                                                                                                                                                                                                      |

|                                |                                                                                                                                                                                                                                                                                                                                                                                                                                                                                      |
|--------------------------------|--------------------------------------------------------------------------------------------------------------------------------------------------------------------------------------------------------------------------------------------------------------------------------------------------------------------------------------------------------------------------------------------------------------------------------------------------------------------------------------|
| mobilization                   | support ventilation, using proportional ventilation modes, employing assist-control ventilation or increasing the fraction of inspired oxygen.                                                                                                                                                                                                                                                                                                                                       |
| Real-time metabolic variable   | Any variable that reports about metabolic utilization on a device (e.g. monitor or ventilator) continuously available before, during or after the mobilization. For example, oxygen consumption and carbon dioxide production.                                                                                                                                                                                                                                                       |
| Real-time respiratory variable | Any variable that reports about respiratory function on a device (e.g. monitor or ventilator) continuously available before, during or after the mobilization. For example, respiratory rate, tidal volume, minute ventilation, oesophageal pressure or diaphragm electrical activity derived variables, pulse oximetry saturation.                                                                                                                                                  |
| Leg cycling                    | Any intervention that produces a movement similar to pedaling with the legs on a cycle-ergometer. Include lower extremity cycle ergometry, either passively completed by the equipment, components of active participation from the patient, or full participation from the patient (3).                                                                                                                                                                                             |
| Arm cycling                    | Any intervention that produces a movement similar to pedaling with the arms on a cycle-ergometer. Include upper extremity cycle ergometry, either passively completed by the equipment, components of active participation from the patient, or full participation from the patient (3).                                                                                                                                                                                             |
| Progressive mobility           | Any intervention that incrementally modifies the patient's activity level. For example, rolling in bed, sitting on the edge of the bed, standing up, and walking (4). Mobility activities progressing from less difficult (e.g., activity in bed) to more difficult (e.g., out of bed activities such as up to chair or ambulation). May include range of motion or strengthening activities, but only as part of a mobility activity and not as a separate therapeutic program (3). |
| Walking                        | Any activity that includes the ambulation of the patient, this can be done with or without assistance, with or without assistance device such as: partial weight support, technical aids. This definition doesn't                                                                                                                                                                                                                                                                    |

|                                      |                                                                                                                                                                                                                                                                                                                                                                                                                                                                                                                                                                                                                                                                                                                                      |
|--------------------------------------|--------------------------------------------------------------------------------------------------------------------------------------------------------------------------------------------------------------------------------------------------------------------------------------------------------------------------------------------------------------------------------------------------------------------------------------------------------------------------------------------------------------------------------------------------------------------------------------------------------------------------------------------------------------------------------------------------------------------------------------|
|                                      | includes “marching on the spot”.                                                                                                                                                                                                                                                                                                                                                                                                                                                                                                                                                                                                                                                                                                     |
| In-bed passive exercise              | Any passive physical intervention that includes passive range of motion, muscle stretching exercises and in-bed positioning, but that are not part of a progressive mobility regimen (3).                                                                                                                                                                                                                                                                                                                                                                                                                                                                                                                                            |
| In-bed active exercise               | Any serial and programmed active intervention with the aim to improve specific attribute of the physical condition, for example: exercises with manual resistance, elastic band, free weights or body weight, active or active-assisted range of motion, neuromuscular facilitation and therapeutic exercises, but that are not part of a progressive mobility regimen (3).                                                                                                                                                                                                                                                                                                                                                          |
| Neuromuscular electrical stimulation | Any intervention that uses a device that sends electrical impulses to peripheric nerves. Neuromuscular electrical stimulation, is a technique that consists of generating visible muscle contractions with portable devices connected to surface electrodes has been shown to be effective in treating impaired muscles as it has the potential to preserve muscle-protein synthesis and prevent muscle atrophy during prolonged periods of immobilization (5).<br>Application of electrical stimulation via electrodes attached to the skin over pre-determined muscles to elicit a muscle contraction. May include passive only (i.e., no active participation from the patient) or active muscle contractions simultaneously (3). |
| Tilt-table                           | Any device that allows a patient to be passively or actively standing or varying angles to the horizontal with the aim to increase ventilation, increase arousal, improve weight bearing of the lower limbs, and facilitate antigravity exercise of the limbs. This technique is used as a precursor to standing when a patient has weakness and cannot stand on his own (6).                                                                                                                                                                                                                                                                                                                                                        |
| FES-cycling                          | Any intervention that uses a cycle-ergometer coordinated with a functional electrical stimulation system. Passive cycling and NMES can be delivered simultaneously and synchronized to produce a coordinated pattern of movements (7).                                                                                                                                                                                                                                                                                                                                                                                                                                                                                               |

|                      |                                                                                                                                                                                                              |
|----------------------|--------------------------------------------------------------------------------------------------------------------------------------------------------------------------------------------------------------|
| Whole-body vibration | Any intervention that use vibration stimuli platform as a countermeasure to muscle atrophy and bone loss during the absence of gravity in space, as well as a training option for professional athletes (8). |
|----------------------|--------------------------------------------------------------------------------------------------------------------------------------------------------------------------------------------------------------|

### References for Table S1

1. Castro-Avila AC, Serón P, Fan E, et al: Effect of Early Rehabilitation during Intensive Care Unit Stay on Functional Status: Systematic Review and Meta-Analysis. *PLOS ONE* 2015; 10:e0130722
2. Zhang L, Hu W, Cai Z, et al: Early mobilization of critically ill patients in the intensive care unit: A systematic review and meta-analysis. *PLOS ONE* 2019; 14:e0223185
3. Reid JC, Unger J, McCaskell D, et al: Physical rehabilitation interventions in the intensive care unit: a scoping review of 117 studies. *Journal of Intensive Care* 2018; 6:80
4. Schujmann DS, Teixeira Gomes T, Lunardi AC, et al: Impact of a Progressive Mobility Program on the Functional Status, Respiratory and Muscular Systems of ICU Patients. *Critical Care Medicine* 2019; 1
5. Maffiuletti NA, Roig M, Karatzanos E, et al: Neuromuscular electrical stimulation for preventing skeletal-muscle weakness and wasting in critically ill patients: A systematic review. *BMC Medicine* 2013; 11:1
6. Chang AT, Boots RJ, Hodges PW, et al: Standing with the assistance of a tilt table improves minute ventilation in chronic critically ill patients. *Archives of Physical Medicine and Rehabilitation* 2004; 85:1972–1976
7. Waldauf P, Gojda J, Urban T, et al: Functional electrical stimulation-assisted cycle ergometry in the critically ill: Protocol for a randomized controlled trial. *Trials* 2019; 20:1–11
8. Wollersheim T, Haas K, Wolf S, et al: Whole-body vibration to prevent intensive care unit-acquired weakness: safety, feasibility, and metabolic response. *Critical Care* 2017; 21:9

**Table S2.** Search terms for the identification of eligible references for scoping review

| Database (Date)                                           | Search Terms                                                                                                                                                                                                                                                                                                                                                                                                                                                                                                                                                                                                                                                                                                                                                                                                                                                                                                                                                       | Results |
|-----------------------------------------------------------|--------------------------------------------------------------------------------------------------------------------------------------------------------------------------------------------------------------------------------------------------------------------------------------------------------------------------------------------------------------------------------------------------------------------------------------------------------------------------------------------------------------------------------------------------------------------------------------------------------------------------------------------------------------------------------------------------------------------------------------------------------------------------------------------------------------------------------------------------------------------------------------------------------------------------------------------------------------------|---------|
| PubMed (NCBI)<br>(November 15, 2019)                      | <p>((((("Critical Illness" OR "Critically ill patients" OR "Mechanically ventilated patients" OR "Intensive Care Units")) AND ("Respiration, Artificial" OR "Noninvasive Ventilation" OR "Ventilatory support" OR "Assisted mechanical ventilation" OR "Proportional ventilation" OR "Pressure support" OR "Work of Breathing" OR "Oxygen Consumption" OR "Ventilatory setting" OR "Oxygen consumption" OR "Work efficiency" OR "Neurally adjusted ventilatory assist" OR "Proportional assisted ventilation" OR "Proportional modes" OR "Assisted modes" OR "Assisted mechanical ventilation" OR "Metabolism")) AND ("Exercise" OR "Exercise Tolerance" OR "Early Ambulation" OR "Physical activity" OR "Early mobilization" OR "Early mobility" OR "Rehabilitation" OR "Physical Therapy Modalities" OR "Physiotherapy")))) AND (Spanish OR English)</p> <p><b>Limits:</b> from inception to present</p> <p><b>Language filters:</b> English and Spanish</p>     | 725     |
| PubMed (NCBI)<br>(February 9, 2021)                       | <p>((((("Critical Illness" OR "Critically ill patients" OR "Mechanically ventilated patients" OR "Intensive Care Units")) AND ("Respiration, Artificial" OR "Noninvasive Ventilation" OR "Ventilatory support" OR "Assisted mechanical ventilation" OR "Proportional ventilation" OR "Pressure support" OR "Work of Breathing" OR "Oxygen Consumption" OR "Ventilatory setting" OR "Oxygen consumption" OR "Work efficiency" OR "Neurally adjusted ventilatory assist" OR "Proportional assisted ventilation" OR "Proportional modes" OR "Assisted modes" OR "Assisted mechanical ventilation" OR "Metabolism")) AND ("Exercise" OR "Exercise Tolerance" OR "Early Ambulation" OR "Physical activity" OR "Early mobilization" OR "Early mobility" OR "Rehabilitation" OR "Physical Therapy Modalities" OR "Physiotherapy")))) AND (Spanish OR English)</p> <p><b>Limits:</b> from November 2019 to present</p> <p><b>Language filters:</b> English and Spanish</p> | 168     |
| CINAHL plus with full text (EBSCO)<br>(November 15, 2019) | <p>("Critical Illness" OR "Critically ill patients" OR "Mechanically ventilated patients" OR "Intensive Care Units") AND ("Respiration, Artificial" OR "Noninvasive Ventilation" OR "Ventilatory support" OR "Assisted mechanical ventilation" OR "Proportional ventilation" OR "Pressure support" OR "Work of Breathing" OR "Oxygen Consumption" OR "Ventilatory setting" OR "Oxygen consumption" OR "Work efficiency" OR "Neurally adjusted ventilatory assist" OR "Proportional assisted ventilation" OR "Proportional modes" OR "Assisted modes" OR "Assisted mechanical ventilation") AND ("Exercise" OR "Exercise Tolerance" OR "Early Ambulation" OR "Physical activity" OR "Early mobilization" OR "Early mobility" OR "Rehabilitation" OR "Physical Therapy Modalities")</p> <p><b>Limits:</b> from inception to present</p> <p><b>Language filters:</b> English and Spanish</p>                                                                          | 275     |
| Rehabilitation & Sports Medicine<br>(November 15, 2019)   | <p>("Critical Illness" OR "Critically ill patients" OR "Mechanically ventilated patients" OR "Intensive Care Units") AND ("Respiration, Artificial" OR "Noninvasive Ventilation" OR "Ventilatory support" OR "Assisted mechanical ventilation" OR "Proportional ventilation" OR "Pressure support" OR "Work</p>                                                                                                                                                                                                                                                                                                                                                                                                                                                                                                                                                                                                                                                    | 22      |

| Database (Date)                           | Search Terms                                                                                                                                                                                                                                                                                                                                                                                                                                                                                                                                                                                                                                                                                                                                                                                                                                                                                                                                                                                                                                                                                                                                                                                                                                                                                                                                                                                                                                                                            | Results |
|-------------------------------------------|-----------------------------------------------------------------------------------------------------------------------------------------------------------------------------------------------------------------------------------------------------------------------------------------------------------------------------------------------------------------------------------------------------------------------------------------------------------------------------------------------------------------------------------------------------------------------------------------------------------------------------------------------------------------------------------------------------------------------------------------------------------------------------------------------------------------------------------------------------------------------------------------------------------------------------------------------------------------------------------------------------------------------------------------------------------------------------------------------------------------------------------------------------------------------------------------------------------------------------------------------------------------------------------------------------------------------------------------------------------------------------------------------------------------------------------------------------------------------------------------|---------|
|                                           | of Breathing" OR "Oxygen Consumption" OR “Ventilatory setting” OR “Oxygen consumption” OR “Work efficiency” OR “Neurally adjusted ventilatory assist” OR “Proportional assisted ventilation” OR "Proportional modes" OR "Assisted modes" OR “Assisted mechanical ventilation”) AND ("Exercise" OR "Exercise Tolerance" OR "Early Ambulation" OR “Physical activity” OR “Early mobilization” OR “Early mobility” OR "Rehabilitation" OR "Physical Therapy Modalities")<br><b>Limits:</b> from inception to present<br><b>Language filters:</b> English and Spanish                                                                                                                                                                                                                                                                                                                                                                                                                                                                                                                                                                                                                                                                                                                                                                                                                                                                                                                       |         |
| Cochrane (November 18, 2019)              | "Respiration, Artificial" OR "Noninvasive Ventilation" OR “Ventilatory support” OR “Assisted mechanical ventilation” OR “Proportional ventilation” OR “Pressure support” OR "Work of Breathing" OR "Oxygen Consumption"                                                                                                                                                                                                                                                                                                                                                                                                                                                                                                                                                                                                                                                                                                                                                                                                                                                                                                                                                                                                                                                                                                                                                                                                                                                                 | 10      |
| PEDro (November 14, 2019)                 | Early mobilization AND mechanical ventilation                                                                                                                                                                                                                                                                                                                                                                                                                                                                                                                                                                                                                                                                                                                                                                                                                                                                                                                                                                                                                                                                                                                                                                                                                                                                                                                                                                                                                                           | 15      |
| ClinicalTrials.gov (November 14, 2019)    | ("Physical Therapy Modalities") AND (“assisted mechanical ventilation” OR "Respiration, Artificial" OR "Critical Illness" OR “critically ill patients” OR “mechanically ventilated patients” OR "Intensive Care Units" OR “ventilatory support”)<br><b>Limits:</b> from inception to present<br><b>Language filters:</b> English and Spanish                                                                                                                                                                                                                                                                                                                                                                                                                                                                                                                                                                                                                                                                                                                                                                                                                                                                                                                                                                                                                                                                                                                                            | 44      |
| Epistemónikos (November 21, 2019)         | (title:(("Critical Illness" OR "Critically ill patients" OR "Mechanically ventilated patients" OR "Intensive Care Units") OR abstract:("Critical Illness" OR "Critically ill patients" OR "Mechanically ventilated patients" OR "Intensive Care Units"))) AND (title:("Exercise" OR "Exercise Tolerance" OR "Early Ambulation" OR "Physical activity" OR "Early mobilization" OR "Early mobility" OR "Rehabilitation" OR "Physical Therapy Modalities" OR "Physiotherapy") OR abstract:("Exercise" OR "Exercise Tolerance" OR "Early Ambulation" OR "Physical activity" OR "Early mobilization" OR "Early mobility" OR "Rehabilitation" OR "Physical Therapy Modalities" OR "Physiotherapy")))) OR abstract:(("Critical Illness" OR "Critically ill patients" OR "Mechanically ventilated patients" OR "Intensive Care Units") OR abstract:("Critical Illness" OR "Critically ill patients" OR "Mechanically ventilated patients" OR "Intensive Care Units"))) AND (title:("Exercise" OR "Exercise Tolerance" OR "Early Ambulation" OR "Physical activity" OR "Early mobilization" OR "Early mobility" OR "Rehabilitation" OR "Physical Therapy Modalities" OR "Physiotherapy") OR abstract:("Exercise" OR "Exercise Tolerance" OR "Early Ambulation" OR "Physical activity" OR "Early mobilization" OR "Early mobility" OR "Rehabilitation" OR "Physical Therapy Modalities" OR "Physiotherapy"))))<br><b>Limits:</b> from inception to present<br><b>Language filters:</b> No filters | 147     |
| Scielo Citation Index (November 18, 2019) | ("Critical Illness" OR “Critically ill patients” OR “Mechanically ventilated patients” OR "Intensive Care Units") AND TEMA: ("Respiration, Artificial" OR "Noninvasive Ventilation" OR “Ventilatory support” OR “Assisted mechanical ventilation” OR “Proportional ventilation” OR “Pressure support” OR "Work of Breathing" OR "Oxygen Consumption" OR “Ventilatory setting”                                                                                                                                                                                                                                                                                                                                                                                                                                                                                                                                                                                                                                                                                                                                                                                                                                                                                                                                                                                                                                                                                                           | 13      |

| Database (Date)                       | Search Terms                                                                                                                                                                                                                                                                                                                                                                                                                                                                                                                                    | Results |
|---------------------------------------|-------------------------------------------------------------------------------------------------------------------------------------------------------------------------------------------------------------------------------------------------------------------------------------------------------------------------------------------------------------------------------------------------------------------------------------------------------------------------------------------------------------------------------------------------|---------|
| Hand Search<br>(November 18,<br>2019) | <p>OR “Oxygen consumption” OR “Work efficiency” OR “Neurally adjusted ventilatory assist” OR “Proportional assisted ventilation” OR "Proportional modes" OR "Assisted modes" OR “Assisted mechanical ventilation”) AND TEMA: ("Exercise" OR "Exercise Tolerance" OR "Early Ambulation" OR “Physical activity” OR “Early mobilization” OR “Early mobility” OR "Rehabilitation" OR "Physical Therapy Modalities")</p> <p><b>Limits:</b> from inception to present</p> <p><b>Language filters:</b> No filters (Results in English and Spanish)</p> | 25      |

**Table S3. Early mobilization interventions and equipment included <sup>a</sup>**

| <b>Intervention</b>                                                 | <b>Assistive equipment and technology</b>  | <b>n = 35, n (%)</b> |
|---------------------------------------------------------------------|--------------------------------------------|----------------------|
| Leg cycling (1–15)                                                  |                                            | 15 (43)              |
|                                                                     | MOTomed Letto 2, RECK-Technik              | 8 (23)               |
|                                                                     | Flexmotor, Cajumoro                        | 4 (11)               |
|                                                                     | RT-300 supine cycle, Restorative Therapies | 1 (3)                |
|                                                                     | Thera-Vital                                | 1 (3)                |
|                                                                     | <i>Not specified</i>                       | 2 (6)                |
| Progressive mobility <sup>b</sup> (9, 15–27)                        |                                            | 14 (40)              |
| In-bed passive exercise <sup>b</sup> (4, 10, 14–16, 22, 25, 26, 28) |                                            | 9 (26)               |
| Walking <sup>b</sup> (15–20, 25, 26)                                |                                            | 8 (23)               |
| In-bed active exercise <sup>b</sup> (4, 14, 15, 25, 26, 29)         |                                            | 6 (17)               |
| NMES (10, 25, 29–31)                                                |                                            | 5 (14)               |
|                                                                     | COMPEX device, MI theta PRO                | 1 (3)                |
|                                                                     | Neurodyn II, Ibramed                       | 1 (3)                |
|                                                                     | <i>Not specified</i>                       | 3 (9)                |
| Tilt-table <sup>b</sup> (15, 22, 23, 32)                            |                                            | 4 (11)               |
| Arm cycling (15, 33, 34)                                            |                                            | 3 (9)                |
|                                                                     | MOTomed Letto 2, RECK-Technik              | 1 (3)                |
|                                                                     | Active Passive Train, Tzora                | 1 (3)                |
|                                                                     | <i>Not specified</i>                       | 1 (3)                |
| FES-cycling (10)                                                    |                                            | 1 (3)                |
|                                                                     | RehaMove, Hasomed                          | 1 (3)                |
| Whole-body vibration (35)                                           |                                            | 1 (3)                |
|                                                                     | Promedi, Vibrosphere and Galileo, home-ICU | 1 (3)                |

<sup>a</sup> Each of the 35 documents reported 1 or more early mobilization intervention.

<sup>b</sup> No assistive equipment and technology was used or specified for this intervention.

NMES = Neuromuscular electrical stimulation, FES = functional electrical stimulation.



### References for Table S3

1. Silva JR, Reboredo MM, Bergamini BC, et al: Impact of Early Passive Exercise With Cycle Ergometer on Ventilator Interaction. *Respiratory Care* 2020; 65:1547–1554
2. Santos LMH, Novaes APL de, Dantas FM de NA, et al: Acute effect of passive cycloergometry on the cardiovascular system and respiratory mechanics of critically ill patients: a randomized controlled trial. *Fisioterapia em Movimento* 2019; 32:1–10
3. Kho ME, Molloy AJ, Clarke FJ, et al: TryCYCLE: A Prospective Study of the Safety and Feasibility of Early In-Bed Cycling in Mechanically Ventilated Patients. *PLOS ONE* 2016; 11:e0167561
4. Maia Coutinho W, Jurema dos Santos L, Fernandes J, et al: Acute effect of the use of cycle ergometer during physical therapy treatment in mechanically ventilated critically ill patients. *Fisioterapia e Pesquisa* 2016; 23:278–283
5. Rialp G: Early Cycloergometric Physiotherapy in Critically Ill Patients With Invasive Mechanical Ventilation. Available at: <https://clinicaltrials.gov/show/nct02478411> 2015; Accessed November 15, 2019
6. Hickmann CE, Roeseler J, Castanares-Zapatero D, et al: Energy expenditure in the critically ill performing early physical therapy. *Intensive Care Medicine* 2014; 40:548–555
7. Camargo Pires-Neto R, Fogaça Kawaguchi YM, Sayuri Hirota A, et al: Very Early Passive Cycling Exercise in Mechanically Ventilated Critically Ill Patients: Physiological and Safety Aspects - A Case Series. *PLOS ONE* 2013; 8:e74182
8. Sommers J, Klooster E, Zoethout SB, et al: Feasibility of Exercise Testing in Patients Who Are Critically Ill: A Prospective, Observational Multicenter Study. *Archives of Physical Medicine and Rehabilitation* 2019; 100:239–246
9. Eggmann S, Verra ML, Luder G, et al: Effects of early, combined endurance and resistance training in mechanically ventilated, critically ill patients: A randomised controlled trial. *PLOS ONE* 2018; 13:e0207428
10. Medrinal C, Combret Y, Prieur G, et al: Comparison of exercise intensity during four early rehabilitation techniques in sedated and ventilated patients in ICU: a randomised cross-over trial. *Critical Care* 2018; 22:110
11. Ringdal M, Warren Stomberg M, Egnell K, et al: In-bed cycling in the ICU; patient safety and recollections with motivational effects. *Acta Anaesthesiologica Scandinavica* 2018; 62:658–665
12. Sommers J, Van Den Boorn M, Engelbert RHH, et al: Feasibility of Muscle Activity Assessment With Surface Electromyography During Bed Cycling Exercise In Intensive Care Unit Patients. *Muscle & Nerve* 2018; 58:688–693
13. Akoumianaki E, Dousse N, Lyazidi A, et al: Can proportional ventilation modes facilitate exercise in critically ill patients? A physiological cross-over study. *Annals of Intensive Care* 2017; 7:64
14. Machado A dos S, Pires-Neto RC, Carvalho MTX, et al: Effects that passive cycling exercise have on muscle strength, duration of mechanical ventilation, and length of hospital stay in critically ill patients: a randomized clinical trial. *Jornal Brasileiro de Pneumologia* 2017; 43:134–139
15. Hickmann CE, Castanares-Zapatero D, Bialais E, et al: Teamwork enables high level of early mobilization in critically ill patients. *Annals of Intensive Care* 2016; 6:80

16. Pohlman MC, Schweickert WD, Pohlman AS, et al: Feasibility of physical and occupational therapy beginning from initiation of mechanical ventilation. *Crit Care Med* 2010; 38:2089–2094
17. Perme C, Chandrashekar RK: Managing the patient on mechanical ventilation in ICU: early mobility and walking program. *Acute Care Perspectives* 2008; 17:10–15
18. Bailey P, Thomsen GE, Spuhler VJ, et al: Early activity is feasible and safe in respiratory failure patients\*. *Critical Care Medicine* 2007; 35:139–145
19. Zafiroopoulos B, Alison JA, McCarren B: Physiological responses to the early mobilisation of the intubated, ventilated abdominal surgery patient. *Australian Journal of Physiotherapy* 2004; 50:95–100
20. Black C, Grocott M, Singer M: The oxygen cost of rehabilitation interventions in mechanically ventilated patients: an observational study. *Physiotherapy* 2020; 107:169–175
21. Nydahl P, Schuchhardt D, Jüttner F, et al: Caloric consumption during early mobilisation of mechanically ventilated patients in Intensive Care Units. *Clinical Nutrition* 2019; 1–6
22. Rebel A, Marzano V, Green M, et al: Mobilisation is feasible in intensive care patients receiving vasoactive therapy: An observational study. *Australian Critical Care* 2019; 32:139–146
23. Beach LJ, Fetterplace K, Edbrooke L, et al: Measurement of physical activity levels in the Intensive Care Unit and functional outcomes: An observational study. *Journal of Critical Care* 2017; 40:189–196
24. Collings N, Cusack R: A repeated measures, randomised cross-over trial, comparing the acute exercise response between passive and active sitting in critically ill patients. *BMC Anesthesiology* 2015; 15:1
25. Ko YJ, Cho YH, Park YH, et al: Feasibility and safety of early physical therapy and active mobilization for patients on extracorporeal membrane oxygenation. *ASAIO Journal* 2015; 61:564–568
26. Mah JW, Staff I, Fichandler D, et al: Resource-efficient mobilization programs in the intensive care unit: Who stands to win? *American Journal of Surgery* 2013; 206:488–493
27. Chang MY, Chang LY, Huang YC, et al: Chair-sitting exercise intervention does not improve respiratory muscle function in mechanically ventilated intensive care unit patients. *Respir Care* 2011; 56:1533–1538
28. Genc A, Koca U, Gunerli A: What Are the Hemodynamic and Respiratory Effects of Passive Limb Exercise for Mechanically Ventilated Patients Receiving Low-Dose Vasopressor/Inotropic Support? *Critical Care Nursing Quarterly* 2014; 37:152–158
29. Akar O, Günay E, Sarinc Ulasli S, et al: Efficacy of neuromuscular electrical stimulation in patients with COPD followed in intensive care unit. *The Clinical Respiratory Journal* 2017; 11:743–750
30. Lago AF, de Oliveira AS, de Souza HCD, et al: The effects of physical therapy with neuromuscular electrical stimulation in patients with septic shock. *Medicine* 2018; 97:e9736
31. Gerovasili V, Tripodaki E, Karatzanos E, et al: Short-term Systemic Effect of Electrical Muscle Stimulation in Critically Ill Patients. *Chest* 2009; 136:1249–1256
32. Chang AT, Boots RJ, Hodges PW, et al: Standing with the assistance of a tilt table improves minute ventilation in chronic critically ill patients. *Archives of Physical*

*Medicine and Rehabilitation* 2004; 85:1972–1976

33. De Beer CR, Van Rooijen AJ, Pretorius JP, et al: Muscle strength and endurance to predict successful extubation in mechanically ventilated patients: A pilot study evaluating the utility of upper-limb muscle strength and ergometry. *Southern African Journal of Critical Care* 2018; 34:44
34. Chen Y-H, Lin H-L, Hsiao H-F, et al: Effects of an additional pressure support level on exercise duration in patients on prolonged mechanical ventilation. *Journal of the Formosan Medical Association* 2015; 114:1204–1210
35. Wollersheim T, Haas K, Wolf S, et al: Whole-body vibration to prevent intensive care unit-acquired weakness: safety, feasibility, and metabolic response. *Critical Care* 2017; 21:9

**Table S4.** Summary of the 35 included documents

| Author, Year      | Study design                                 | Study sample | APACHE II <sup>a</sup>                           | Early mobilization intervention(s)        | Assistive rehabilitation equipment and technology | Ventilatory mode and respiratory parameter                         | Mechanical ventilator(s)           | Metabolic and respiratory real-time variables                      | Main results of the metabolic and respiratory variables on early mobilization                                                                                                                                                                                                                                                                         | Device(s) to assess metabolic/respiratory variables (other than ventilator)                                                       | Reason to measure variables |
|-------------------|----------------------------------------------|--------------|--------------------------------------------------|-------------------------------------------|---------------------------------------------------|--------------------------------------------------------------------|------------------------------------|--------------------------------------------------------------------|-------------------------------------------------------------------------------------------------------------------------------------------------------------------------------------------------------------------------------------------------------------------------------------------------------------------------------------------------------|-----------------------------------------------------------------------------------------------------------------------------------|-----------------------------|
| Silva, 2020 (1)   | Observational study                          | 8            | 8.3 ± 2.6 <sup>b</sup> ; 53.3 ± 8.3 <sup>e</sup> | Leg cycling                               | Flexmotor, Cajumoro                               | PCV and no change ventilatory parameters during early mobilization | Servo S/Maquet                     | RR, Vt, SpO <sub>2</sub> and asynchrony index                      | The asynchrony index increased during exercise (median 32.1%), compared to baseline (median 6.6%), returning to initial levels during the recovery period (median 2.7%)                                                                                                                                                                               | Multiparameter monitor: DX 2020 monitor, Dixtal Biomédica, Brazil                                                                 | Safety                      |
| Black, 2020 (2)   | Observational study                          | 26           | 9 (2-14) <sup>b</sup>                            | Progressive mobility and walking          | Not specified                                     | PS level adjustment                                                | Not specified                      | RR, VE, VO <sub>2</sub> , VCO <sub>2</sub> and RER                 | There was considerable variation in the VO <sub>2</sub> of the physical activities between participants. The recovery time for 1 in 4 rehabilitation sessions was longer than the rehabilitation activity time                                                                                                                                        | Indirect calorimeter: Medgraphics Ultima (MGU)                                                                                    | Physiological response      |
| Nydahl, 2019 (3)  | Observational study                          | 66           | 5.6±1.6 <sup>b</sup>                             | Progressive mobility                      | Not specified                                     | Assisted mode                                                      | Engström/Carestation GE Healthcare | EE                                                                 | Active transfer to a chair showed higher differences of caloric consumption (n=12, mean 217.5 Kcal/d) than passive transfer without standing (n=5, mean 161.5 Kcal/d), however, the difference is not significant. A typical sequence of progressive mobility, would require an additional 4.56 Kcal compared to caloric consumption without mobility | Indirect calorimeter: COV-X, ESCOV-X or ventilation system Engstrom Carestation (attached or included in the ventilation circuit) | Physiological response      |
| Rebel, 2019 (4)   | Observational study                          | 119          | 21.4±7.7                                         | Progressive mobility, PROM and Tilt-table | Not specified                                     | Not specified                                                      | Not specified                      | SpO <sub>2</sub> and RR                                            | Patients who were more likely to experience an adverse event were those with higher SpO <sub>2</sub> (OR=1.83, 95% CI=1.11 to 3.10), and with lower RR (OR=1.03)                                                                                                                                                                                      | Not specified                                                                                                                     | Safety                      |
| Santos, 2019 (5)  | Clinical trial (Randomized controlled trial) | 30           | CG: 22.6±4.2, IC: 22.7±8.4                       | Leg cycling                               | Flexmotor, Cajumoro                               | VCV and Vt                                                         | Not specified                      | RR                                                                 | There were no differences for the RR measured before, soon after the end of the protocol, and at 10 and 30min after the application of passive cycling and in the CG                                                                                                                                                                                  | Not specified                                                                                                                     | Physiological response      |
| Sommers, 2019 (6) | Observational study                          | 37           | 73 (60–104) <sup>c</sup>                         | Leg cycling                               | MOTomed Letto 2                                   | Not specified                                                      | Not specified                      | RR, SpO <sub>2</sub> , RER, VO <sub>2</sub> , and VCO <sub>2</sub> | During peak exercise in the active cycling test, the median RR, VO <sub>2</sub> , and VCO <sub>2</sub> increased significantly, from 20 to 24 breaths/min (p<001); the VO <sub>2</sub> increased from 291 to 384 mL/min; and the VCO <sub>2</sub> increased from 217 to 279 mL/min (p<.001).                                                          | Indirect calorimeter: Quark RMR ICU, COSMED, The Metabolic Company                                                                | Physiological response      |

| Author, Year           | Study design                                 | Study sample | APACHE II <sup>a</sup> | Early mobilization intervention(s)      | Assistive rehabilitation equipment and technology                                 | Ventilatory mode and respiratory parameter                                              | Mechanical ventilator(s)                        | Metabolic and respiratory real-time variables                        | Main results of the metabolic and respiratory variables on early mobilization                                                                                                                                                                                                                                                          | Device(s) to assess metabolic/respiratory variables (other than ventilator)                                               | Reason to measure variables |
|------------------------|----------------------------------------------|--------------|------------------------|-----------------------------------------|-----------------------------------------------------------------------------------|-----------------------------------------------------------------------------------------|-------------------------------------------------|----------------------------------------------------------------------|----------------------------------------------------------------------------------------------------------------------------------------------------------------------------------------------------------------------------------------------------------------------------------------------------------------------------------------|---------------------------------------------------------------------------------------------------------------------------|-----------------------------|
|                        |                                              |              |                        |                                         |                                                                                   |                                                                                         |                                                 |                                                                      | There was no change in the RER                                                                                                                                                                                                                                                                                                         |                                                                                                                           |                             |
| de Beer, 2018 (7)      | Observational study                          | 30           | Not specified          | Arm cycling                             | MOTomed Letto 2                                                                   | Not specified                                                                           | Avea and Vela/Carefusion                        | RSBI                                                                 | RSBI 38.0 (25.0 to 65.0) prior to the tests.                                                                                                                                                                                                                                                                                           | None                                                                                                                      | Safety                      |
| Eggmann, 2018 (8)      | Clinical trial (Randomized controlled trial) | 107          | CG: 23±7, IG: 22±8     | Leg cycling and Progressive mobility    | MOTomed Letto 2                                                                   | Not specified                                                                           | Not specified                                   | VO <sub>2</sub> and SpO <sub>2</sub>                                 | VO <sub>2</sub> had significant differences (p<0.013) before, during and after the intervention between the IG and the CG (approximate values at 300-325 mL/min). There were no differences for SpO <sub>2</sub> .                                                                                                                     | Not specified                                                                                                             | Physiological response      |
| Lago, 2018 (9)         | Study protocol                               | N/A          | N/A                    | NMES                                    | Neurodyn II, Ibramed                                                              | Not specified                                                                           | Evita XL/Dräger                                 | EE, VO <sub>2</sub> , VCO <sub>2</sub> , RR and SpO <sub>2</sub>     | N/A (Study protocol)                                                                                                                                                                                                                                                                                                                   | Indirect calorimeter: DELTATRAC II Metabolic Monitor, Datex-Ohmeda, Helsinki, Finland                                     | Physiological response      |
| Medrinal, 2018 (10)    | Cross-over study                             | 19           | 57.5±24 <sup>d</sup>   | PROM, Leg cycling, NMES and FES-cycling | MOTomed Letto 2 and RehaMove. There is no information about the NMES device used. | PSV mode, PS level, PEEP and FiO <sub>2</sub>                                           | ICU ventilator                                  | HbO <sub>2</sub> , HHb, RR and Vt                                    | RR was significantly higher during FES-cycling than during PROM and quadriceps NMES (respectively, 24 c/min vs. 20 c/min (p<0.001) vs. 21 c/min (p=0.005)). There was no difference for Vt. HbO <sub>2</sub> decreased significantly by 13% (95% CI - 31.8 to - 4.7) during FES-cycling.                                               | Not specified                                                                                                             | Physiological response      |
| Ringdal, 2018 (11)     | Observational study                          | 6            | Not specified          | Leg cycling                             | Not specified                                                                     | Not specified                                                                           | Not specified                                   | SpO <sub>2</sub> and RR                                              | The maximum changes in physiological parameters in the group monitored during IBC were: RR -7 to +11 breaths per minutes and SpO <sub>2</sub> -3 to +4%.                                                                                                                                                                               | Not specified                                                                                                             | Safety                      |
| Sommers, 2018 (12)     | Observational study                          | 9            | 17.5 (14–21)           | Leg cycling                             | MOTomed Letto 2                                                                   | Not specified                                                                           | Not specified                                   | SpO <sub>2</sub> and RR                                              | Not specified.                                                                                                                                                                                                                                                                                                                         | Not specified                                                                                                             | Safety                      |
| Akar, 2017 (13)        | Clinical trial (Randomized trial)            | 30           | Not specified          | AROM and NMES                           | COMPEX device, MI theta PRO                                                       | Not specified                                                                           | Not specified                                   | RR                                                                   | RR decrease in time to move from bed to chair in the group treated additionally with NMES                                                                                                                                                                                                                                              | Not specified                                                                                                             | Safety                      |
| Akoumianaki, 2017 (14) | Cross-over study                             | 10           | 21 (16.5–27.3)         | Leg cycling                             | MOTomed Letto 2                                                                   | PSV, PAV, NAVA, PS level, inspiratory flow triggering, cycling off and FiO <sub>2</sub> | Servo I/Maquet and Puritan Bennett 840/Covidien | VO <sub>2</sub> , Vt, VE, SpO <sub>2</sub> , RR and asynchrony index | Despite a difference in baseline VO <sub>2</sub> , the patients ventilated with PSV exhibited a significant increase in VO <sub>2</sub> during exercise (ΔVO <sub>2</sub> 77.6 mL/min, 59.9–96.5) while VO <sub>2</sub> did not change compared to baseline value during exercise with PAV or NAVA (ΔVO <sub>2</sub> 46.3 mL/min, 5.7– | Indirect calorimeter: Quark RMR ICU, COSMED, Rome, Italy. Pneumotachograph: Fleish No. 2; Metabo; Epalinges, Switzerland. | Physiological response      |

| Author, Year           | Study design                                | Study sample | APACHE II <sup>a</sup>     | Early mobilization intervention(s)                                                 | Assistive rehabilitation equipment and technology | Ventilatory mode and respiratory parameter adjustment | Mechanical ventilator(s) | Metabolic and respiratory real-time variables                    | Main results of the metabolic and respiratory variables on early mobilization                                                                                                                                                                                                                                                                                                                                                                                                                                                                                                                                                              | Device(s) to assess metabolic/respiratory variables (other than ventilator)                                                                | Reason to measure variables |
|------------------------|---------------------------------------------|--------------|----------------------------|------------------------------------------------------------------------------------|---------------------------------------------------|-------------------------------------------------------|--------------------------|------------------------------------------------------------------|--------------------------------------------------------------------------------------------------------------------------------------------------------------------------------------------------------------------------------------------------------------------------------------------------------------------------------------------------------------------------------------------------------------------------------------------------------------------------------------------------------------------------------------------------------------------------------------------------------------------------------------------|--------------------------------------------------------------------------------------------------------------------------------------------|-----------------------------|
|                        |                                             |              |                            |                                                                                    |                                                   |                                                       |                          |                                                                  | 63.7) (p < 0.05). As a result, PAV or NAVA were associated with a better work efficiency ( $\Delta$ VO <sub>2</sub> /Wmean) than PSV.                                                                                                                                                                                                                                                                                                                                                                                                                                                                                                      |                                                                                                                                            |                             |
| Beach, 2017 (15)       | Observational study                         | 47           | 23.0±7.5                   | Progressive mobility and Tilt-table                                                | Not specified                                     | Not specified                                         | Not specified            | EE                                                               | The mean difference in measures of REE of 79.9 kcal (favouring indirect calorimetry) with 95% of the differences falling between -722.1 and 881.9 kcal.                                                                                                                                                                                                                                                                                                                                                                                                                                                                                    | Indirect calorimeter: DELTATRAC II Metabolic Monitor, Datex-Ohmeda, Helsinki, Finland                                                      | Physiological response      |
| Machado, 2017 (16)     | Clinical trial (Randomized clinical trial)  | 38           | CG: 18.1±6.4, IG: 17.3±6.7 | Leg cycling, PROM and AROM                                                         | MOTomed Letto 2                                   | Not specified                                         | Not specified            | SpO <sub>2</sub>                                                 | SpO <sub>2</sub> were measured but the results of these variables are not specified.                                                                                                                                                                                                                                                                                                                                                                                                                                                                                                                                                       | Multiparameter monitor: DX 2022; Dixtal Biomédica, Manaus, Brazil                                                                          | Safety                      |
| Wollersheim, 2017 (17) | Clinical trial (Pilot interventional study) | 19           | 53 (35-78) <sup>d</sup>    | Whole-body vibration (WBV)                                                         | Promedi, Vibrosphere and Galileo, home-ICU        | Not specified                                         | Not specified            | EE, VO <sub>2</sub> , VCO <sub>2</sub> , SpO <sub>2</sub> and RR | There was an increase EE only during WBV. Comparing the WBV period with the baseline, VO <sub>2</sub> were significantly increased (p=0.012) and VCO <sub>2</sub> was enhanced (p<0.001), showing increased EE (p=0.007). Physiotherapy led to increase VCO <sub>2</sub> (p=0.041) but not to increased VO <sub>2</sub> or EE. Physiotherapy (p<0.01) and WBV (p<0.001) increased the RR significantly compared with baseline. The RQ increase significant during physiotherapy (p=0.033), which is caused by increased VCO <sub>2</sub> . SpO <sub>2</sub> did not differ significantly from baseline, interventions and resting periods. | Multiparameter monitor: Intellivue, MP30, Phillips. Indirect calorimeter: DELTATRAC II Metabolic Monitor, Datex-Ohmeda, Helsinki, Finland. | Physiological response      |
| Hickmann, 2016 (18)    | Observational study                         | 171          | 18±7                       | Leg cycling, Arm cycling, Progressive mobility, Walking, PROM, AROM and Tilt-table | Not specified                                     | VCV, PCV and PSV                                      | Not specified            | SpO <sub>2</sub> and RR                                          | RR and SpO <sub>2</sub> variations observed immediately after active exercises like walking, cycling, or manual mobilization were not clinically significant, returning to baseline values after 15 min.                                                                                                                                                                                                                                                                                                                                                                                                                                   | Not specified                                                                                                                              | Physiological response      |
| Kho, 2016 (19)         | Observational study                         | 33           | 24.3±6.7                   | Leg cycling                                                                        | RT-300 supine cycle                               | FiO <sub>2</sub> adjustment                           | Not specified            | SpO <sub>2</sub> and asynchrony                                  | There no was differences in the pre and post SpO <sub>2</sub> (95.6% to 95.3%).                                                                                                                                                                                                                                                                                                                                                                                                                                                                                                                                                            | Not specified                                                                                                                              | Safety                      |
| Maia Coutinho,         | Clinical trial (Randomized                  | 25           | CG: 23,6±7,6, IG: 27,8±4,9 | Leg cycling, PROM and                                                              | Flexmotor, Cajumoro                               | Not specified                                         | Servo I/Maquet           | RR and Vt                                                        | There were no significant differences for Vt and RR from pre                                                                                                                                                                                                                                                                                                                                                                                                                                                                                                                                                                               | ICU multi-parametric monitor: Infinity Kappa,                                                                                              | Physiological response      |

| Author, Year        | Study design        | Study sample | APACHE II <sup>a</sup>                               | Early mobilization intervention(s)                 | Assistive rehabilitation equipment and technology | Ventilatory mode and respiratory parameter                            | Mechanical ventilator(s)                  | Metabolic and respiratory real-time variables   | Main results of the metabolic and respiratory variables on early mobilization                                                                                                                                                                                                                                                                                     | Device(s) to assess metabolic/respiratory variables (other than ventilator)           | Reason to measure variables |
|---------------------|---------------------|--------------|------------------------------------------------------|----------------------------------------------------|---------------------------------------------------|-----------------------------------------------------------------------|-------------------------------------------|-------------------------------------------------|-------------------------------------------------------------------------------------------------------------------------------------------------------------------------------------------------------------------------------------------------------------------------------------------------------------------------------------------------------------------|---------------------------------------------------------------------------------------|-----------------------------|
| 2016 (20)           | clinical trial)     |              |                                                      | AROM                                               |                                                   |                                                                       | and Evita 4/Dräger                        |                                                 | to post intervention for the IG (Vt: 455 to 431; RR: 21,7 to 20,3) and CG (Vt: 506 to 537; RR: 18,8 to 20,2).                                                                                                                                                                                                                                                     | Dräger, Germany                                                                       |                             |
| Chen, 2015 (21)     | Observational study | 15           | Not specified                                        | Arm cycling                                        | Active Passive Train, Tzora                       | PSV mode and PS level adjustment                                      | Not specified                             | SpO <sub>2</sub> and RR                         | No significant differences among the three PS levels in the changes of RR and SpO <sub>2</sub> at the end of the exercise test were observed.                                                                                                                                                                                                                     | Multiparameter monitor: Philips Medizin System GmbH 71034, Böblingen, Germany         | Physiological response      |
| Collings, 2015 (22) | Cross-over study    | 10           | Arm A: 16.8 (15.04–26.16), Arm B: 20.6 (12.86–20.74) | Progressive mobility                               | Not specified                                     | Assisted mode                                                         | Engström Elvira/Carestation GE Healthcare | VO <sub>2</sub> , VCO <sub>2</sub> , RR, Vt, VE | SOEOB was associated with a significant increase in VO <sub>2</sub> in comparison to PCT. During SOEOB, VO <sub>2</sub> increasing from 262.33 to 353.02 mL/min (p=0.002) and VCO <sub>2</sub> increasing from 171.93 to 206.23 mL/min (p=0.026). PCT elicited a minimal increase in VO <sub>2</sub> , VCO <sub>2</sub> and VE suggesting a low metabolic demand. | Indirect calorimeter: CCOX module via the Engström Elvira ventilator                  | Physiological response      |
| Ko, 2015 (23)       | Observational study | 8            | Not specified                                        | Progressive mobility, Walking, PROM, AROM and NMES | Not specified                                     | FiO <sub>2</sub> adjustment, ECMO blood and sweep gas flow adjustment | Not specified                             | SpO <sub>2</sub> , RR, and ECMO blood flow      | The blood flow rate of ECMO was higher during PT than before PT (paired t; p = 0.013). RR was 21.2±1.2 (NMES and PROM) 26.3±6.3 (sitting) 34±4.2 (Strengthening), 30.9±0.9 (standing or marching in place) and 28 (walking).                                                                                                                                      | Not specified                                                                         | Safety                      |
| Rialp, 2015 (24)    | Study protocol      | N/A          | N/A                                                  | Leg cycling                                        | MOTomed Letto 2                                   | Not specified                                                         | Not specified                             | SpO <sub>2</sub> and RR                         | N/A (Study protocol)                                                                                                                                                                                                                                                                                                                                              | Not specified                                                                         | Safety                      |
| Genc, 2014 (25)     | Observational study | 120          | Not specified                                        | PROM                                               | Not specified                                     | PCV, PRVC, PSV, and SIMV modes                                        | Not specified                             | SpO <sub>2</sub> and RR                         | In the patients who did not receive vasopressor/inotropic support (group 1), SpO <sub>2</sub> increased significantly (P <0.05). In group 2, SpO <sub>2</sub> increased significantly after PLEs.                                                                                                                                                                 | Patient-monitoring equipment: Dräger Medical Systems, Inc, Telford, Pennsylvania      | Physiological response      |
| Hickmann, 2014 (26) | Observational study | 49           | 15±7, 16±4 and 22±6                                  | Leg cycling                                        | MOTomed Letto 2 and Thera-Vital                   | PSV mode                                                              | Not specified                             | EE, RQ, VO <sub>2</sub> and VCO <sub>2</sub>    | Exercise-induced changes in VO <sub>2</sub> and EE differed significantly between patients (Pat) and healthy volunteers (Ctrl) at 3W and were close to significance at 6W: increment in VO <sub>2</sub> (mL/min) in Pat-3W vs Ctrl-3W was from 297 to 400 vs 268 to 343 (p=0.04).                                                                                 | Indirect calorimeter: DELTATRAC II Metabolic Monitor, Datex-Ohmeda, Helsinki, Finland | Physiological response      |

| Author, Year                  | Study design                                 | Study sample | APACHE II <sup>a</sup>     | Early mobilization intervention(s)           | Assistive rehabilitation equipment and technology | Ventilatory mode and respiratory parameter                                  | Mechanical ventilator(s)           | Metabolic and respiratory real-time variables                                        | Main results of the metabolic and respiratory variables on early mobilization                                                                                                                                                                                                                                                                                                                                                                                                                                                                                                                                                | Device(s) to assess metabolic/respiratory variables (other than ventilator) | Reason to measure variables |
|-------------------------------|----------------------------------------------|--------------|----------------------------|----------------------------------------------|---------------------------------------------------|-----------------------------------------------------------------------------|------------------------------------|--------------------------------------------------------------------------------------|------------------------------------------------------------------------------------------------------------------------------------------------------------------------------------------------------------------------------------------------------------------------------------------------------------------------------------------------------------------------------------------------------------------------------------------------------------------------------------------------------------------------------------------------------------------------------------------------------------------------------|-----------------------------------------------------------------------------|-----------------------------|
|                               |                                              |              |                            |                                              |                                                   |                                                                             |                                    |                                                                                      | Expressed in EE (kcal/24 h), this increment was from 2,006 to 2,710 vs 1,817 to 2,308 (p=0.04) for the same population. In Pat-6W vs Ctrl-6W, VO <sub>2</sub> increment was from 281 to 425 vs 243 to 360 (p=0.20) and 1,900 to 2,891 vs 1,651 to 2,465 (p=0.23) when expressed in EE (kcal/24 h).                                                                                                                                                                                                                                                                                                                           |                                                                             |                             |
| Camargo Pires-Neto, 2013 (27) | Observational study                          | 18           | 58±13 <sup>e</sup>         | Leg cycling                                  | Flexmotor, Cajumoro                               | VCV and PCV; and no change ventilatory parameters during early mobilization | Engström/Carestation GE Healthcare | VO <sub>2</sub> , VCO <sub>2</sub> , EtCO <sub>2</sub> , RR, Vt and SpO <sub>2</sub> | RR and Vt (mean RR rest level = 23/min and mean Vt rest level = 350 mL) did not change during exercise and recovery. Metabolic parameters did not change during exercise and recovery. The VO <sub>2</sub> rest value was 185.7 mL/min with no mean change during exercise (-9% to 21%) and 2% after recovery (-25% to 31%; NS). The VCO <sub>2</sub> rest value was 168.5 mL/min with a mean increase of 5% during exercise (-30% to 21%) and 1% after recovery (-24% to 31%; NS). The EtCO <sub>2</sub> rest value was 32.8 mmHg with a mean change of 0.9% during exercise (-4% to 5%) and after recovery (-8% to 3%; NS) | Indirect calorimeter: GE-Engstrom Carestation, CT, USA                      | Physiological response      |
| Mah, 2013 (28)                | Clinical trial (Quazi-experimental trial)    | 28           | CG: 26.2±5, IC: 26.9±4.5   | Progressive mobility, Walking, PROM and AROM | Not specified                                     | VCV and PSV mode; FiO <sub>2</sub> and PS level adjustment                  | Not specified                      | None                                                                                 | None                                                                                                                                                                                                                                                                                                                                                                                                                                                                                                                                                                                                                         | Not specified                                                               | N/A                         |
| Chang, 2011 (29)              | Clinical trial (Randomized controlled study) | 36           | CG: 14.6±7.6, IG: 17.3±8.3 | Progressive mobility                         | Not specified                                     | VCV and PCV mode; and PEEP                                                  | Puritan Bennett 840/Covidien       | SpO <sub>2</sub> , RR, Vt, and RSBI                                                  | Before the treatment on day 1, there were no significant differences in RR, Vt, RSBI, SpO <sub>2</sub> and between the 2 groups.                                                                                                                                                                                                                                                                                                                                                                                                                                                                                             | Patient Monitor: Intellivue, Phillips Medizin System, Boeblingen, Germany   | Physiological response      |
| Pohlman, 2010 (30)            | Observational study                          | 49           | 20 (15.8–24)               | Progressive mobility, Walking and PROM       | Not specified                                     | No change ventilatory parameters during early mobilization                  | Transport ventilator               | SpO <sub>2</sub> and RR                                                              | SpO <sub>2</sub> and RR were measured but the results of these variables are not specified.                                                                                                                                                                                                                                                                                                                                                                                                                                                                                                                                  | Not specified                                                               | Safety                      |
| Gerovasili,                   | Observational                                | 35           | CG: 14±8,                  | NMES                                         | Not specified                                     | VCV mode                                                                    | Not                                | StO <sub>2</sub> , RR and                                                            | The mean StO <sub>2</sub> did not differ                                                                                                                                                                                                                                                                                                                                                                                                                                                                                                                                                                                     | Sto2: InSpectra,                                                            | Physiological               |



| Author, Year             | Study design        | Study sample | APACHE II <sup>a</sup> | Early mobilization intervention(s) | Assistive rehabilitation equipment and technology | Ventilatory mode and respiratory parameter | Mechanical ventilator(s) | Metabolic and respiratory real-time variables | Main results of the metabolic and respiratory variables on early mobilization                                                                                                                                                                                                                                                                                                                                                  | Device(s) to assess metabolic/respiratory variables (other than ventilator)                                                               | Reason to measure variables |
|--------------------------|---------------------|--------------|------------------------|------------------------------------|---------------------------------------------------|--------------------------------------------|--------------------------|-----------------------------------------------|--------------------------------------------------------------------------------------------------------------------------------------------------------------------------------------------------------------------------------------------------------------------------------------------------------------------------------------------------------------------------------------------------------------------------------|-------------------------------------------------------------------------------------------------------------------------------------------|-----------------------------|
| 2009 (31)                | study               |              | IG: 17±5               |                                    |                                                   | and PSV mode                               | specified                | SpO <sub>2</sub>                              | significantly before and after the NMES session (81±16% vs 83±16%, respectively). The StO <sub>2</sub> value did not differ between the two measurements in control patients. The RR increased by 1 breath/min after the NMES session (mean RR, 18±6 breaths/min vs 19±7 breaths/min, respectively), although it did not reach statistical significance (p>0.05).                                                              | Hutchinson Technology, Hutchinson, MN and InSpectra, version 2.0, for Windows running in MatLab, version 7.0, MathWorks, Inc; Natick, MA) | response                    |
| Perme, 2008 (32)         | Narrative Review    | N/A          | N/A                    | Progressive mobility and Walking   | Not specified                                     | Not specified                              | Not specified            | RR                                            | N/A (Narrative review)                                                                                                                                                                                                                                                                                                                                                                                                         | N/A                                                                                                                                       | Safety                      |
| Bailey, 2007 (33)        | Observational study | 103          | 21±6.3                 | Progressive mobility and Walking   | Not specified                                     | A/C mode and FiO <sub>2</sub> adjustment   | Not specified            | SpO <sub>2</sub>                              | SpO <sub>2</sub> were measured but the results of these variables are not specified.                                                                                                                                                                                                                                                                                                                                           | Not specified                                                                                                                             | Safety                      |
| Chang, 2004 (34)         | Observational study | 15           | 4 (4–7) <sup>b</sup>   | Tilt-table                         | Not specified                                     | FiO <sub>2</sub> adjustment                | Not specified            | RR, Vt and VE                                 | Standing in the tilted position for 5 minutes produced significant increases in VE (P<0.001) and produced both increases in respiratory rate (P<0.001) and VT (P<0.016) compared with baseline levels. These changes were maintained during the tilt intervention and immediately post tilt. Twenty minutes after the tilt, there were no significant changes in ventilatory measures of Vm, Vt, compared with initial values. | Portable respiratory mechanics monitor: Ventrak, model 1550                                                                               | Physiological response      |
| Zafiroopoulos, 2004 (35) | Observational study | 15           | Not specified          | Progressive mobility and Walking   | Not specified                                     | FiO <sub>2</sub> adjustment                | Not specified            | RR, Vt, VE, Ti, Te and SpO <sub>2</sub>       | Standing resulted in significant increases in VE from 15.1±3.1 l/min in supine to 21.3±3.6 l/min in standing (p<0.001). The increase in VE in standing was achieved by significant increases in Vt from 712.7±172.8 ml to 883.4±196.3 ml (p=0.008) and in RR from 21.4±5.0 breaths/min to 24.9±4.5 breaths/min (p=0.03). No further increases were observed in these parameters beyond standing when                           | Pneumotachograph: Model 3813 Hans Rudolph Inc., Kansas, USA Patient Monitor: Spacelabs Inc., 90600A Series Monitor, Washington USA        | Physiological response      |

| Author, Year | Study design | Study sample | APACHE II <sup>a</sup> | Early mobilization intervention(s) | Assistive rehabilitation equipment and technology | Ventilatory mode and respiratory parameter | Mechanical ventilator(s) | Metabolic and respiratory real-time variables | Main results of the metabolic and respiratory variables on early mobilization                                | Device(s) to assess metabolic/respiratory variables (other than ventilator) | Reason to measure variables |
|--------------|--------------|--------------|------------------------|------------------------------------|---------------------------------------------------|--------------------------------------------|--------------------------|-----------------------------------------------|--------------------------------------------------------------------------------------------------------------|-----------------------------------------------------------------------------|-----------------------------|
|              |              |              |                        |                                    |                                                   |                                            |                          |                                               | activity was progressed to walking on the spot for one minute. There was no change in the SpO <sub>2</sub> . |                                                                             |                             |

APACHE II = Acute Physiology and Chronic Health Evaluation II, CG = control group, IG = intervention group, N/A = not applicable, NMES = Neuromuscular electrical stimulation, PROM = in-bed passive exercise, AROM = In-bed active exercise, FES = functional electrical stimulation, A/C = assist control mode, PAV = Proportional assist ventilation, NAVA = Neurally adjusted ventilatory assist, VCV = volume-controlled ventilation, PCV = pressure-controlled ventilation, PRVC = pressure-regulated volume control ventilation, SIMV = synchronized intermittent mandatory ventilation, PSV = pressure support ventilation, PS = pressure support, PEEP = Positive end-expiratory pressure, FiO<sub>2</sub> = fraction of inspired oxygen, ECMO = extracorporeal membrane oxygenation, EM = early mobilization, GE = General Electric, ICU = intensive care unit, EE = energy expenditure, RR = respiratory rate, VO<sub>2</sub> = oxygen consumption, VCO<sub>2</sub> = carbon dioxide of production, EtCO<sub>2</sub> = end-tidal carbon dioxide, RER = respiratory exchange ratio, Vt = tidal volume, W = watts, SpO<sub>2</sub> = pulse oximetry saturation, Sto<sub>2</sub> = tissue oxygen saturation, REE = resting energy expenditure, WBW = whole-body vibration, RQ = respiratory quotient, SOEOb = sitting on the edge of the bed, PCT = passive chair transfer, VE = minute ventilation, PLEs = passive limb exercises, Kcal = kilocalorie, RSBI = rapid shallow breathing index, PT = physical therapy, HbO<sub>2</sub> = oxyhaemoglobin, HHb = deoxyhaemoglobin.

<sup>a</sup> APACHE II scores are shown as mean±SD or median (IQR) according to each study

<sup>b</sup> Sequential Organ Failure Assessment (SOFA)

<sup>c</sup> APACHE IV

<sup>d</sup> Simplified Acute Physiology Score II (SAPS II)

<sup>e</sup> Simplified Acute Physiology Score II (SAPS III)

#### References for Table S4

1. Silva JR, Reboredo MM, Bergamini BC, et al: Impact of Early Passive Exercise With Cycle Ergometer on Ventilator Interaction. *Respiratory Care* 2020; 65:1547–1554
2. Black C, Grocott M, Singer M: The oxygen cost of rehabilitation interventions in mechanically ventilated patients: an observational study. *Physiotherapy* 2020; 107:169–175
3. Nydahl P, Schuchhardt D, Jüttner F, et al: Caloric consumption during early mobilisation of mechanically ventilated patients in Intensive Care Units. *Clinical Nutrition* 2019; 1–6
4. Rebel A, Marzano V, Green M, et al: Mobilisation is feasible in intensive care patients receiving vasoactive therapy: An observational study. *Australian Critical Care* 2019; 32:139–146
5. Santos LMH, Novaes APL de, Dantas FM de NA, et al: Acute effect of passive cycloergometry on the cardiovascular system and respiratory mechanics of critically ill patients: a randomized controlled

- trial. *Fisioterapia em Movimento* 2019; 32:1–10
6. Sommers J, Klooster E, Zoethout SB, et al: Feasibility of Exercise Testing in Patients Who Are Critically Ill: A Prospective, Observational Multicenter Study. *Archives of Physical Medicine and Rehabilitation* 2019; 100:239–246
  7. De Beer CR, Van Rooijen AJ, Pretorius JP, et al: Muscle strength and endurance to predict successful extubation in mechanically ventilated patients: A pilot study evaluating the utility of upper-limb muscle strength and ergometry. *Southern African Journal of Critical Care* 2018; 34:44
  8. Eggmann S, Verra ML, Luder G, et al: Effects of early, combined endurance and resistance training in mechanically ventilated, critically ill patients: A randomised controlled trial. *PLOS ONE* 2018; 13:e0207428
  9. Lago AF, de Oliveira AS, de Souza HCD, et al: The effects of physical therapy with neuromuscular electrical stimulation in patients with septic shock. *Medicine* 2018; 97:e9736
  10. Medrinal C, Combret Y, Prieur G, et al: Comparison of exercise intensity during four early rehabilitation techniques in sedated and ventilated patients in ICU: a randomised cross-over trial. *Critical Care* 2018; 22:110
  11. Ringdal M, Warren Stomberg M, Egnell K, et al: In-bed cycling in the ICU; patient safety and recollections with motivational effects. *Acta Anaesthesiologica Scandinavica* 2018; 62:658–665
  12. Sommers J, Van Den Boorn M, Engelbert RHH, et al: Feasibility of Muscle Activity Assessment With Surface Electromyography During Bed Cycling Exercise In Intensive Care Unit Patients. *Muscle & Nerve* 2018; 58:688–693
  13. Akar O, Günay E, Sarinc Ulasli S, et al: Efficacy of neuromuscular electrical stimulation in patients with COPD followed in intensive care unit. *The Clinical Respiratory Journal* 2017; 11:743–750
  14. Akoumianaki E, Dousse N, Lyazidi A, et al: Can proportional ventilation modes facilitate exercise in critically ill patients? A physiological cross-over study: Pressure support versus proportional ventilation during lower limb exercise in ventilated critically ill patients. *Annals of Intensive Care* 2017; 7:64
  15. Beach LJ, Fetterplace K, Edbrooke L, et al: Measurement of physical activity levels in the Intensive Care Unit and functional outcomes: An observational study. *Journal of Critical Care* 2017; 40:189–196
  16. Machado A dos S, Pires-Neto RC, Carvalho MTX, et al: Effects that passive cycling exercise have on muscle strength, duration of mechanical ventilation, and length of hospital stay in critically ill patients: a randomized clinical trial. *Jornal Brasileiro de Pneumologia* 2017; 43:134–139
  17. Wollersheim T, Haas K, Wolf S, et al: Whole-body vibration to prevent intensive care unit-acquired weakness: safety, feasibility, and metabolic response. *Critical Care* 2017; 21:9
  18. Hickmann CE, Castanares-Zapatero D, Bialais E, et al: Teamwork enables high level of early mobilization in critically ill patients. *Annals of Intensive Care* 2016; 6:80

19. Kho ME, Molloy AJ, Clarke FJ, et al: TryCYCLE: A Prospective Study of the Safety and Feasibility of Early In-Bed Cycling in Mechanically Ventilated Patients. *PLOS ONE* 2016; 11:e0167561
20. Maia Coutinho W, Jurema dos Santos L, Fernandes J, et al: Acute effect of the use of cycle ergometer during physical therapy treatment in mechanically ventilated critically ill patients. *Fisioterapia e Pesquisa* 2016; 23:278–283
21. Chen Y-H, Lin H-L, Hsiao H-F, et al: Effects of an additional pressure support level on exercise duration in patients on prolonged mechanical ventilation. *Journal of the Formosan Medical Association* 2015; 114:1204–1210
22. Collings N, Cusack R: A repeated measures, randomised cross-over trial, comparing the acute exercise response between passive and active sitting in critically ill patients. *BMC Anesthesiology* 2015; 15:1
23. Ko Y, Cho YH, Park YH, et al: Feasibility and Safety of Early Physical Therapy and Active Mobilization for Patients on Extracorporeal Membrane Oxygenation. *ASAIO Journal* 2015; 61:564–568
24. Rialp G: Early Cycloergometric Physiotherapy in Critically Ill Patients With Invasive Mechanical Ventilation. Available at: <https://clinicaltrials.gov/show/nct02478411> 2015; Accessed November 15, 2019
25. Genc A, Koca U, Gunerli A: What Are the Hemodynamic and Respiratory Effects of Passive Limb Exercise for Mechanically Ventilated Patients Receiving Low-Dose Vasopressor/Inotropic Support? *Critical Care Nursing Quarterly* 2014; 37:152–158
26. Hickmann CE, Roeseler J, Castanares-Zapatero D, et al: Energy expenditure in the critically ill performing early physical therapy. *Intensive Care Medicine* 2014; 40:548–555
27. Camargo Pires-Neto R, Fogaça Kawaguchi YM, Sayuri Hirota A, et al: Very Early Passive Cycling Exercise in Mechanically Ventilated Critically Ill Patients: Physiological and Safety Aspects - A Case Series. *PLOS ONE* 2013; 8:e74182
28. Mah JW, Staff I, Fichandler D, et al: Resource-efficient mobilization programs in the intensive care unit: who stands to win? *The American Journal of Surgery* 2013; 206:488–493
29. Chang M-Y, Chang L-Y, Huang Y-C, et al: Chair-Sitting Exercise Intervention Does Not Improve Respiratory Muscle Function in Mechanically Ventilated Intensive Care Unit Patients. *Respiratory Care* 2011; 56:1533–1538
30. Pohlman MC, Schweickert WD, Pohlman AS, et al: Feasibility of physical and occupational therapy beginning from initiation of mechanical ventilation. *Crit Care Med* 2010; 38:2089–2094
31. Gerovasili V, Tripodaki E, Karatzanos E, et al: Short-term systemic effect of electrical muscle stimulation in critically ill patients. *Chest* 2009; 136:1249–1256
32. Perme C, Chandrashekar KR: Managing the patient on mechanical ventilation in ICU : Early mobility and walking program. *Acute Care Perspectives* 2008; 17:10–15
33. Bailey P, Thomsen GE, Spuhler VJ, et al: Early activity is feasible and safe in respiratory failure patients\*. *Critical Care Medicine* 2007; 35:139–145
34. Chang AT, Boots RJ, Hodges PW, et al: Standing with the assistance of a tilt table improves minute ventilation in chronic critically ill patients. *Archives of Physical Medicine and Rehabilitation* 2004;

85:1972–1976

35. Zafiropoulos B, Alison JA, McCarren B: Physiological responses to the early mobilisation of the intubated, ventilated abdominal surgery patient. *Australian Journal of Physiotherapy* 2004; 50:95–100
